# Supplementary material
Source: PubMed Central journal article supplement (PMC5801348)
Supplement: ajtr0010-0077-f9.pdf [file ajtr0010-0077-f9.pdf]

## Inhibition of NF- $\kappa$ B pathway under munziq treatment

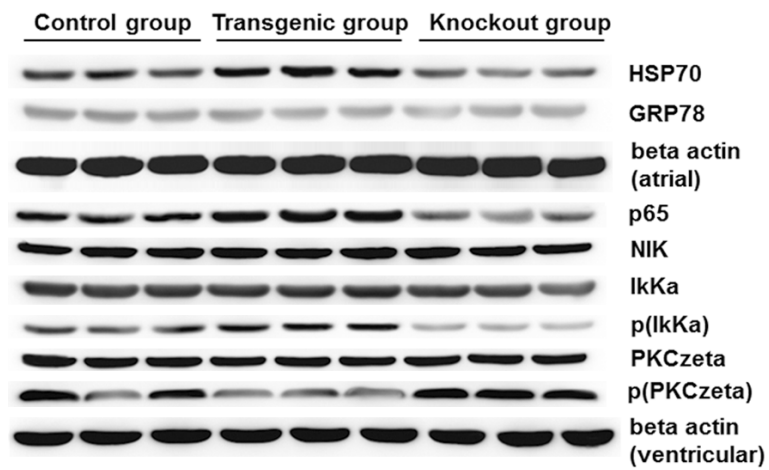

**Supplementary Figure 1.** Analysis of related protein levels. Protein expression was detected by western blot. Representative western blot results were shown. Three duplicate lanes were set up for each group.
